# Supplementary material for: Highly selective and sensitive simultaneous nanomolar detection of Cs(i) and Al(iii) ions using tripodal organic nanoparticles in aqueous media: the effect of the urea backbone on chemosensing
Source: Royal Society of Chemistry journal article supplement (doi:10.1039/d0ra03171b), 2020-01-01
Supplement: d0ra03171b1.pdf [file d0ra03171b1.pdf]

**Highly selective and sensitive simultaneous nanomolar detection of Cs(I) and Al(III) ions by tripodal organic nanoparticles in aqueous medium: The effect of urea backbone on chemosensing**

**Jayanti Mishra<sup>a,b</sup>, Manpreet Kaur<sup>c</sup>, Navneet Kaur<sup>c\*</sup>, Ashok K. Ganguli<sup>d\*</sup>**

<sup>a</sup>Centre for Nanoscience and Nanotechnology (UIEAST), Panjab University, Chandigarh, 160014, India

<sup>b</sup> Department of Chemistry, East Point College of Engineering and Technology, Virgo Nagar Post, Avalahalli, Bengaluru-560049, Karnataka

<sup>c</sup>Department of Chemistry, Panjab University, Chandigarh, 160014, India; Email: [navneetkaur@pu.ac.in](mailto:navneetkaur@pu.ac.in)

<sup>d</sup>Department of Chemistry, Indian Institute of Technology, Hauz Khas, New Delhi, 110016, India; Email: [ashok@chemistry.iitd.ac.in](mailto:ashok@chemistry.iitd.ac.in)

**\*Corresponding authors**

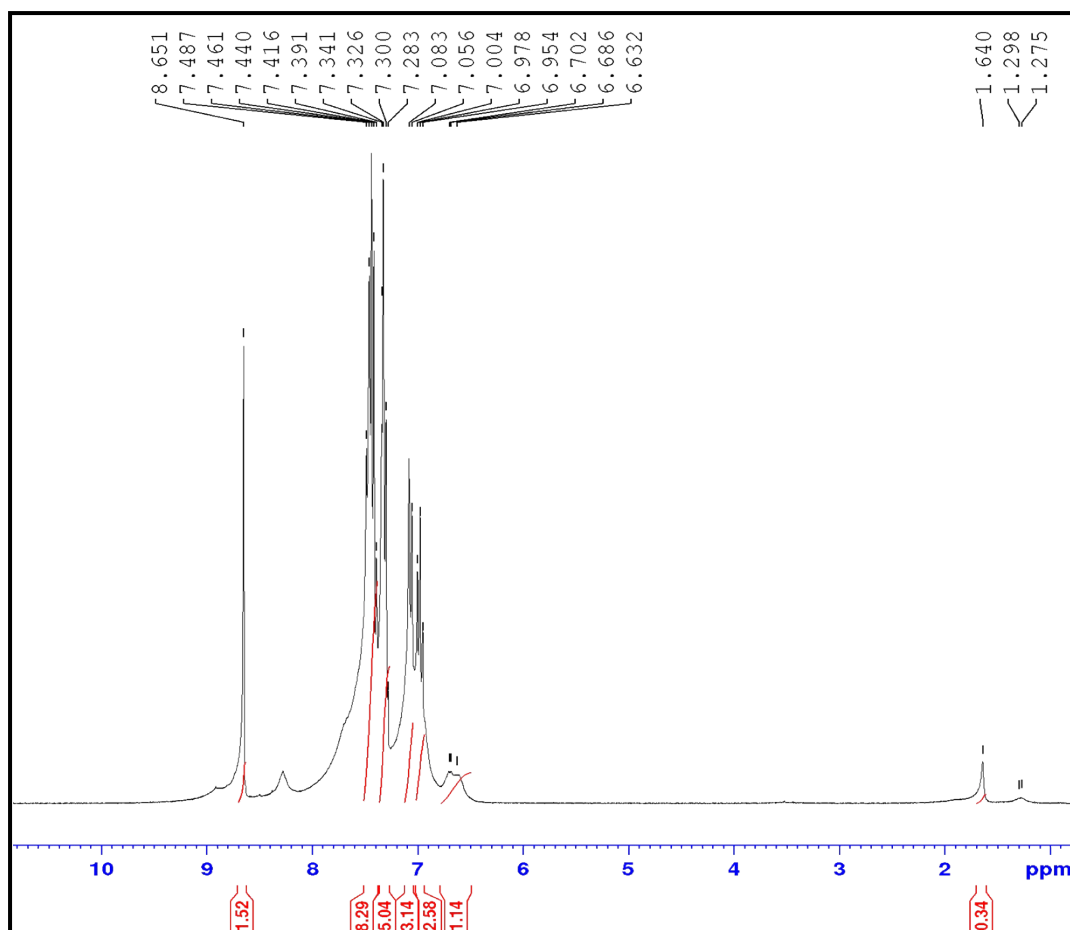

Figure 1S. <sup>1</sup>H NMR spectrum of Schiff base

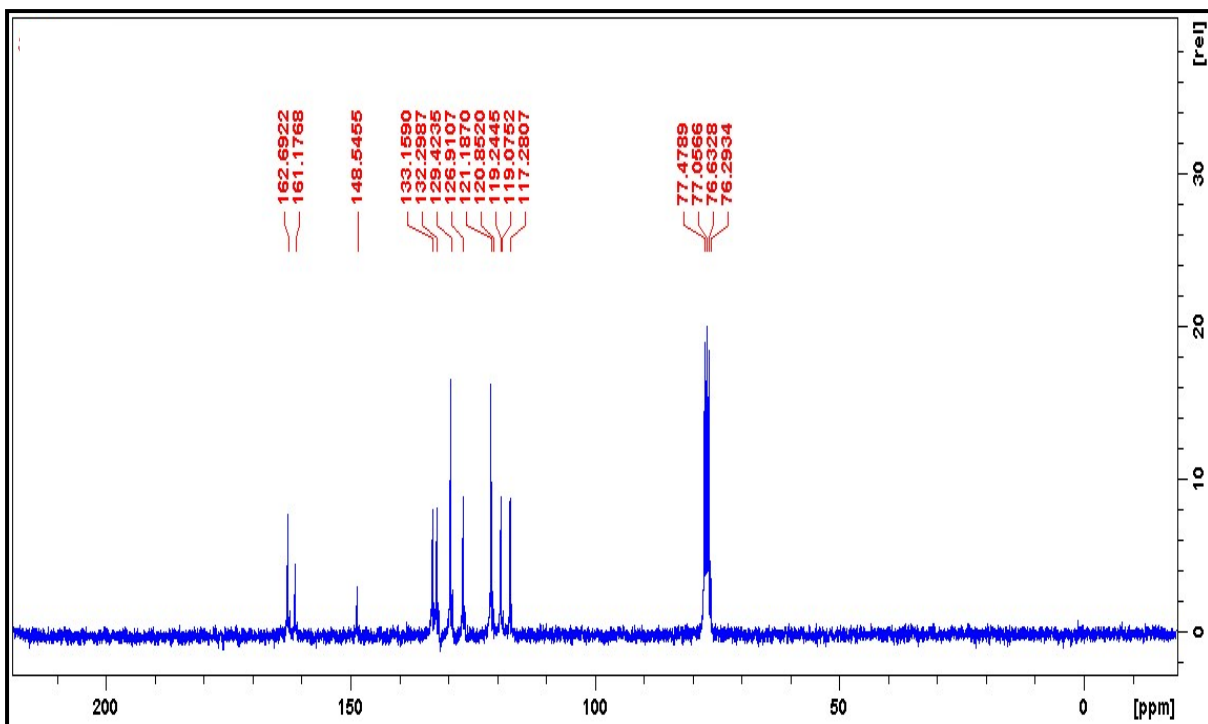

Figure 2S. <sup>13</sup>C NMR spectrum of Schiff base

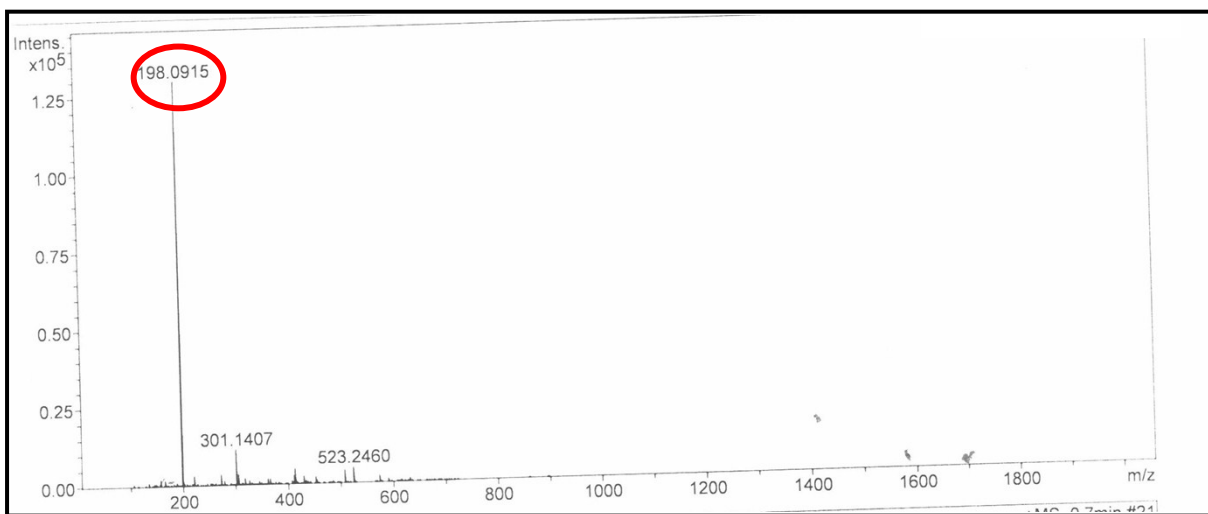

Figure 3S. Mass spectrum of Schiff base

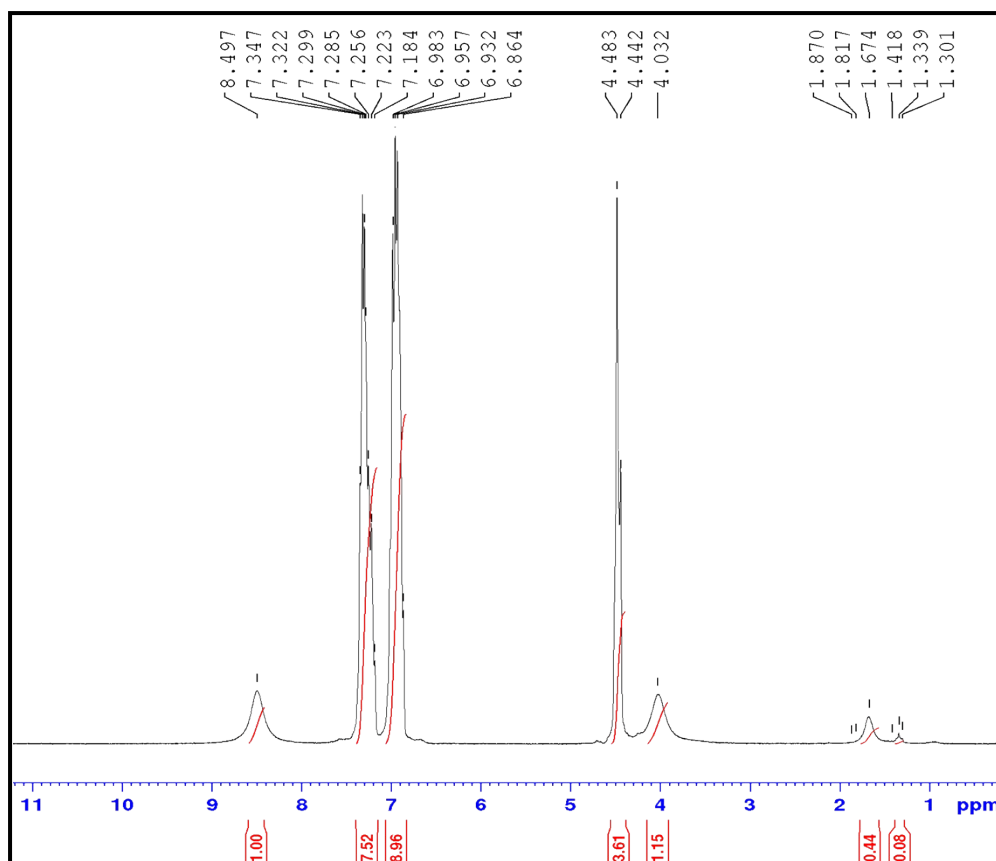

Figure 4S.  $^1\text{H}$  NMR spectrum of reduced product of Schiff base

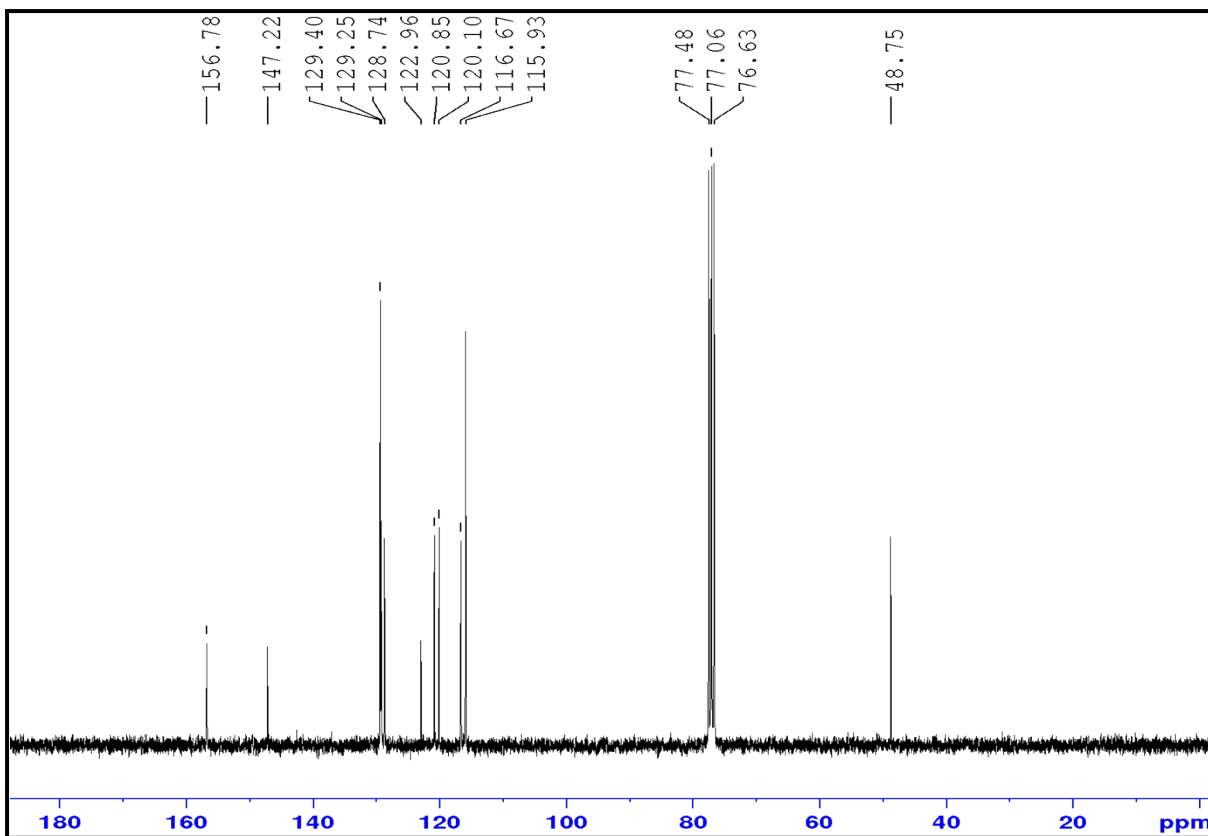

Figure 5S.  $^{13}\text{C}$  NMR spectrum of reduced product of Schiff base

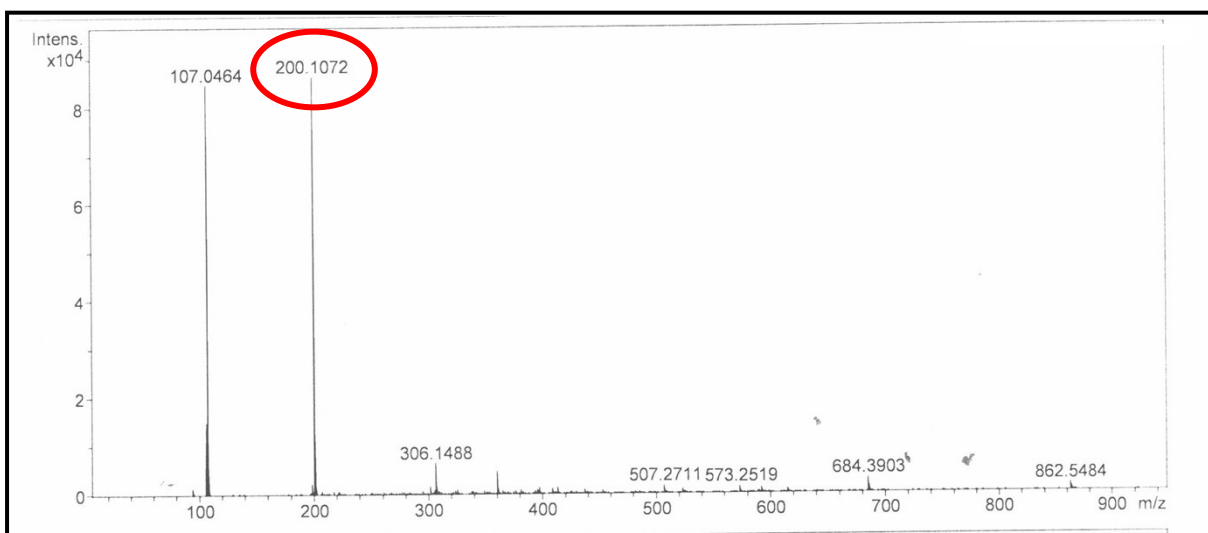

Figure 6S. Mass spectrum of reduced product of Schiff base

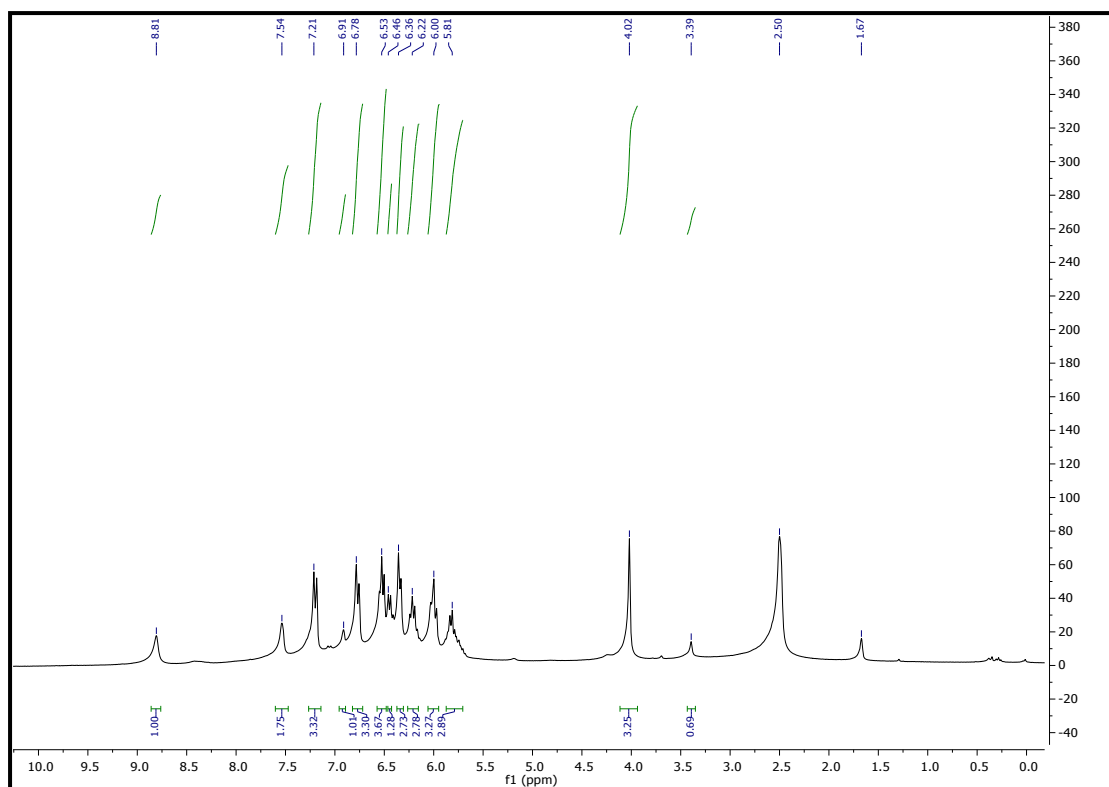

Figure 7S.  $^1\text{H}$  NMR spectrum of ligand 1

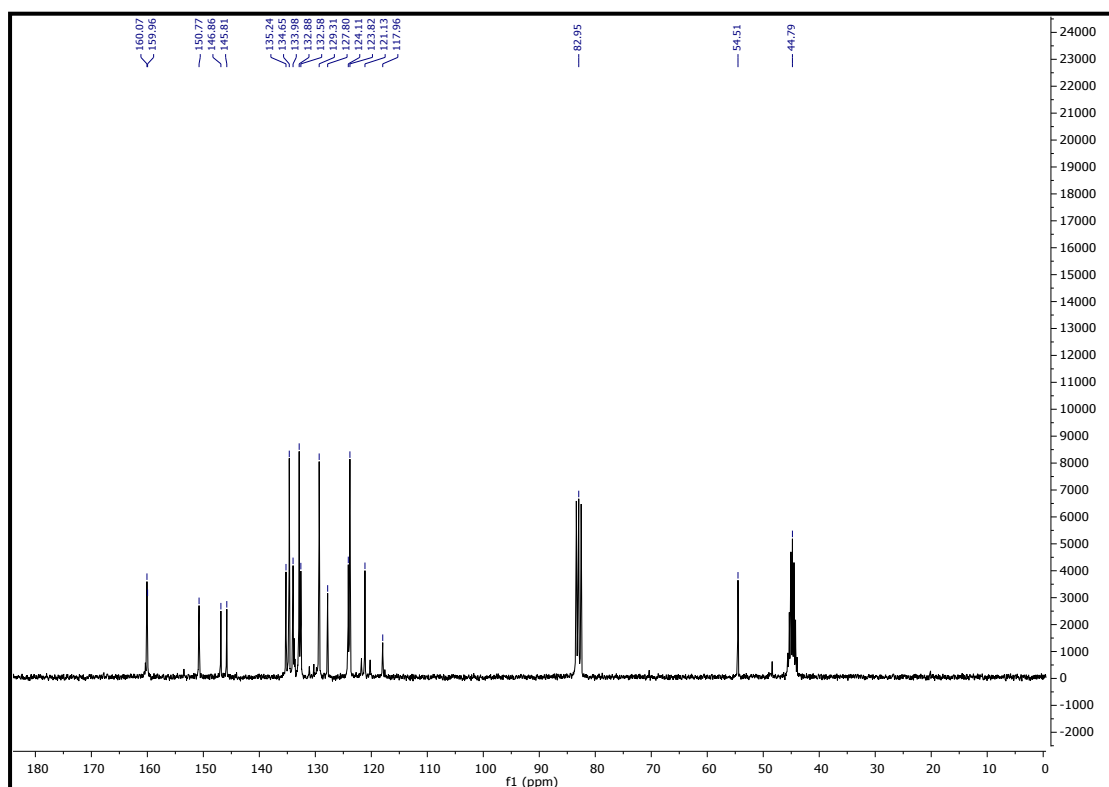

Figure 8S.  $^{13}\text{C}$  NMR spectrum of ligand 1

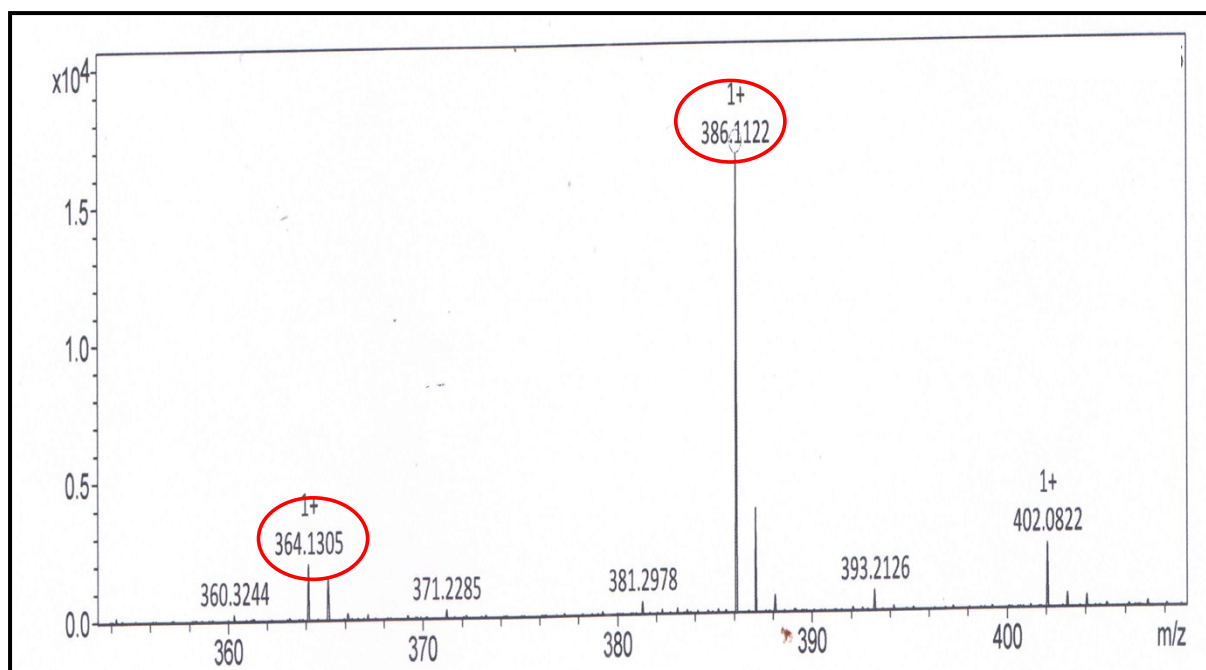

Figure 9S. Mass spectrum of ligand 1

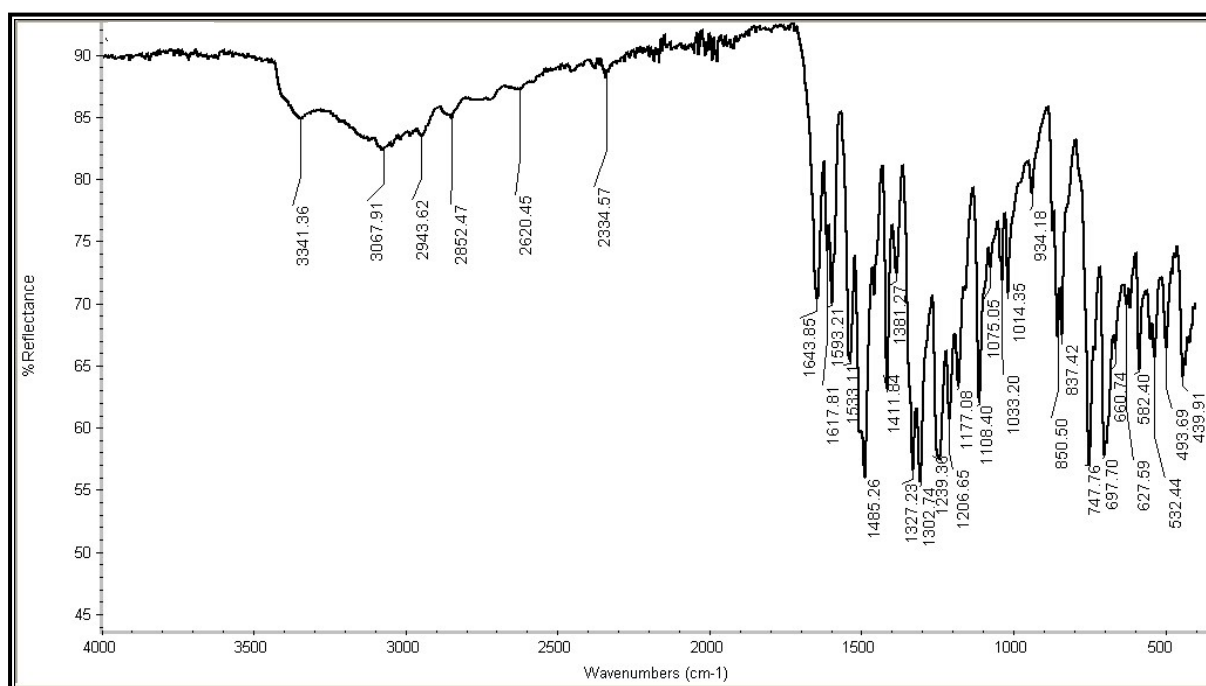

Figure 10S. IR spectrum of ligand 1

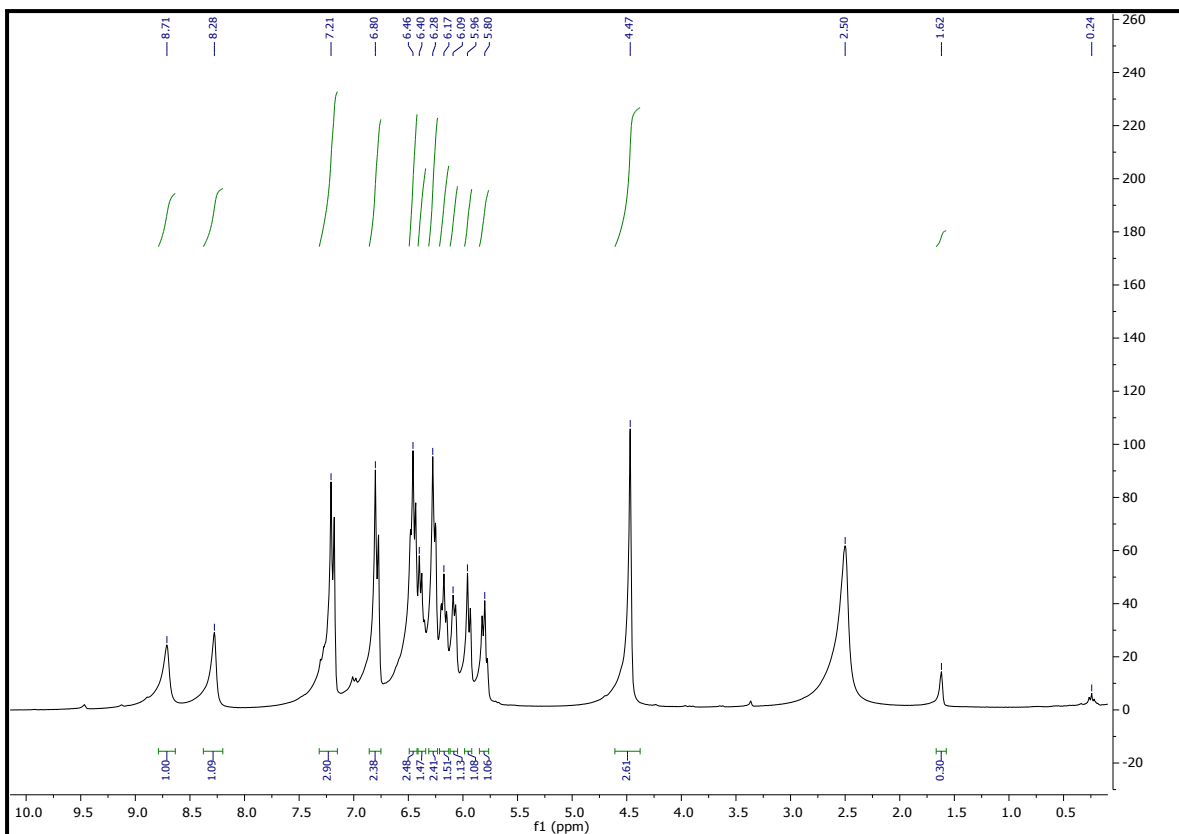

Figure 11S.  $^1\text{H}$  NMR spectrum of ligand 2

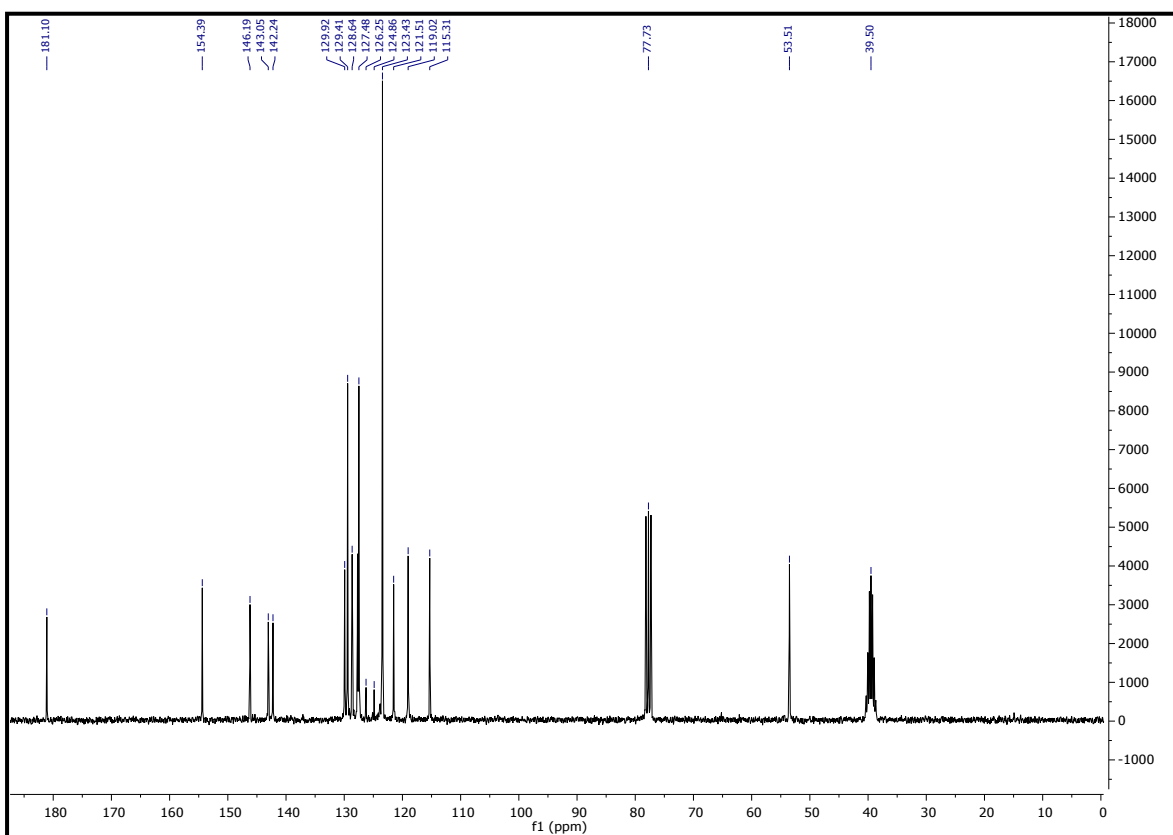

Figure 12S:  $^{13}\text{C}$  NMR spectrum of ligand 2



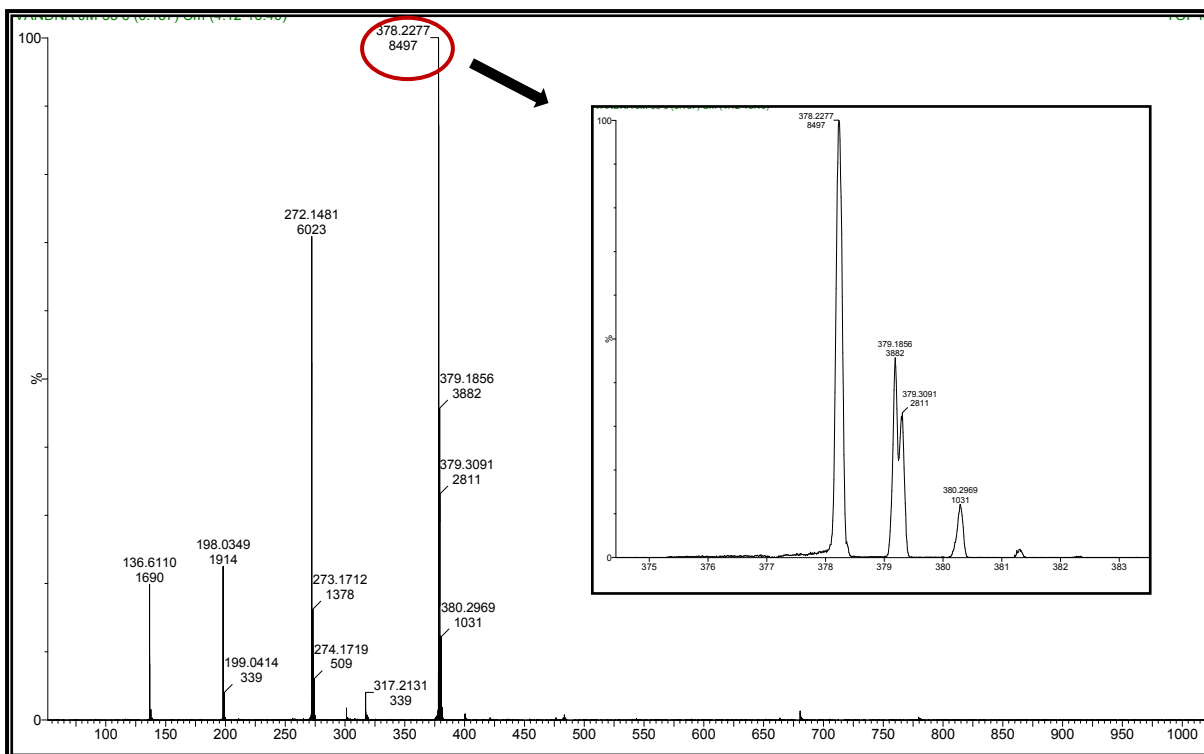

Figure 13S: Mass spectrum of ligand 2

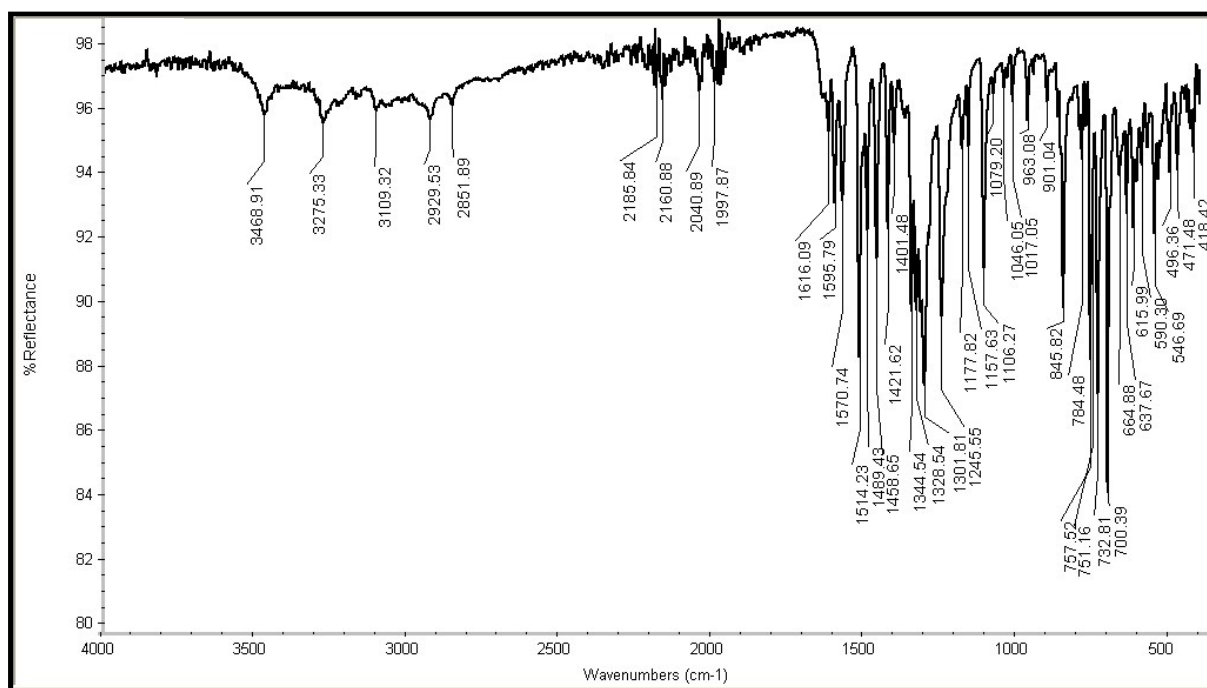

Figure 14S: IR spectrum of ligand 2

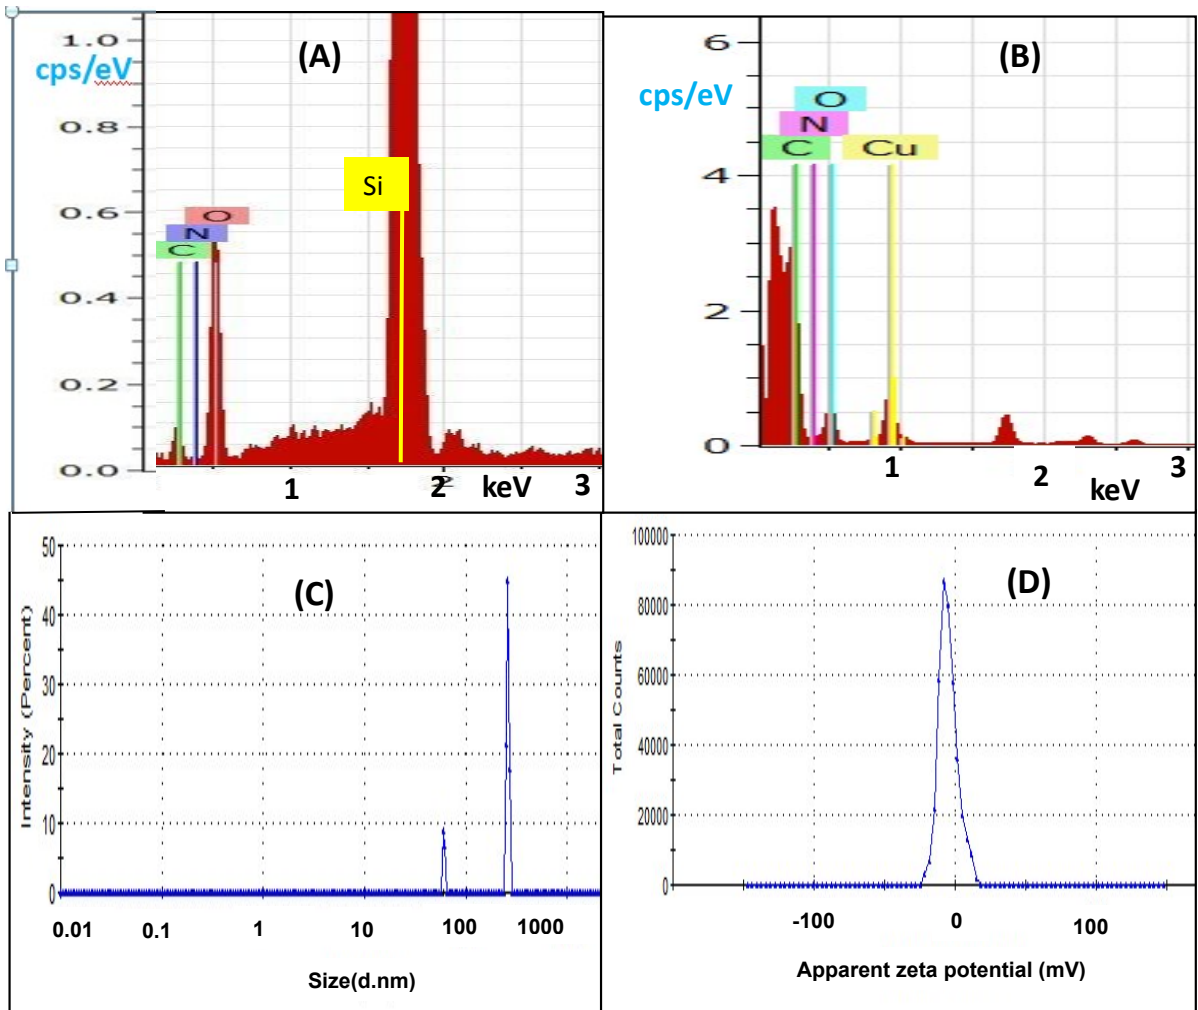

Figure 15S: (A) SEM-EDX spectrum analysis; (B) TEM-EDX spectrum analysis; (C) Size distribution and (D) Zeta potential profile of 1-ONP

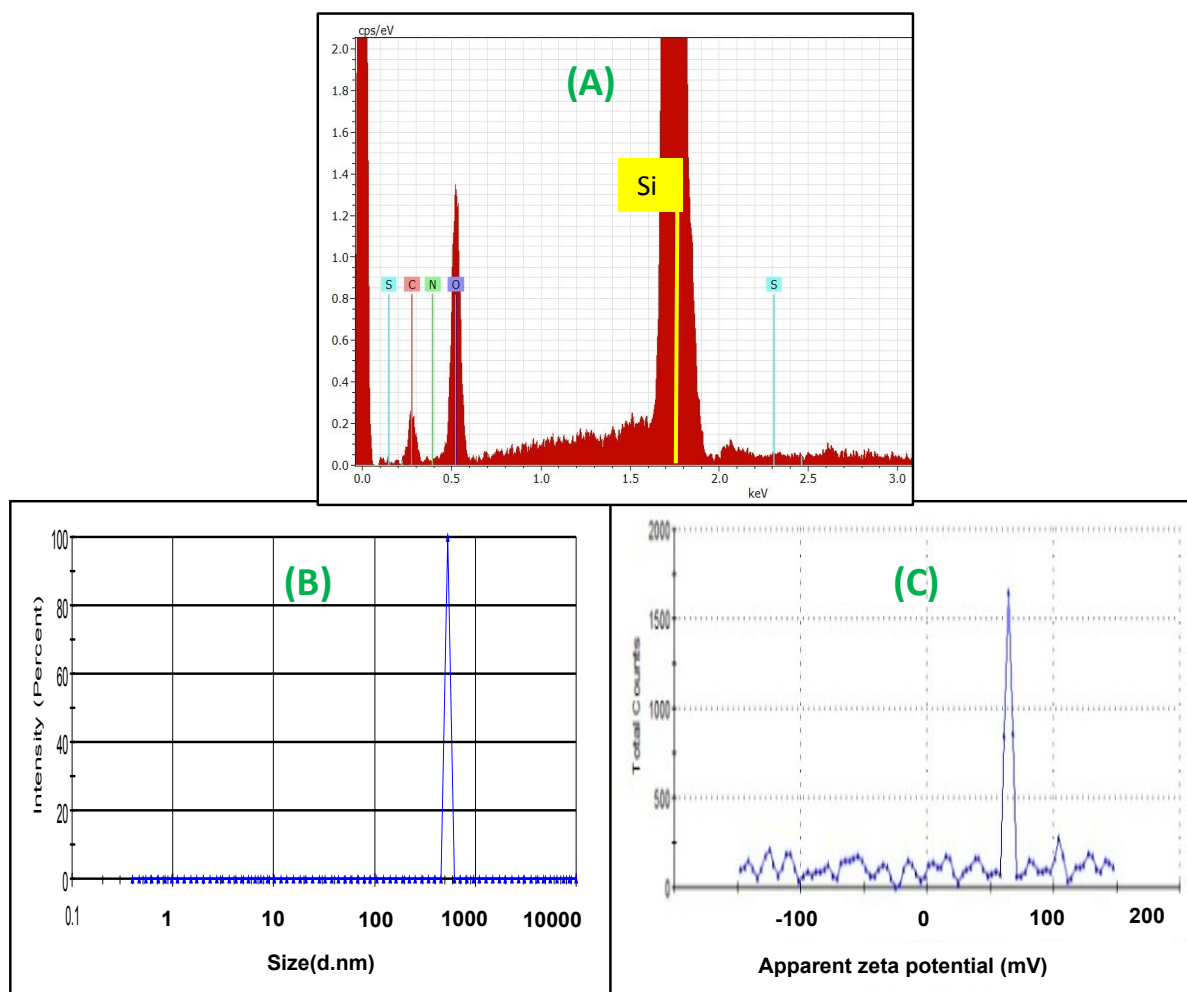

Figure 16S: (A) SEM-EDX spectrum analysis; (B) Size distribution and (C) Zeta potential profile of 2-ONP

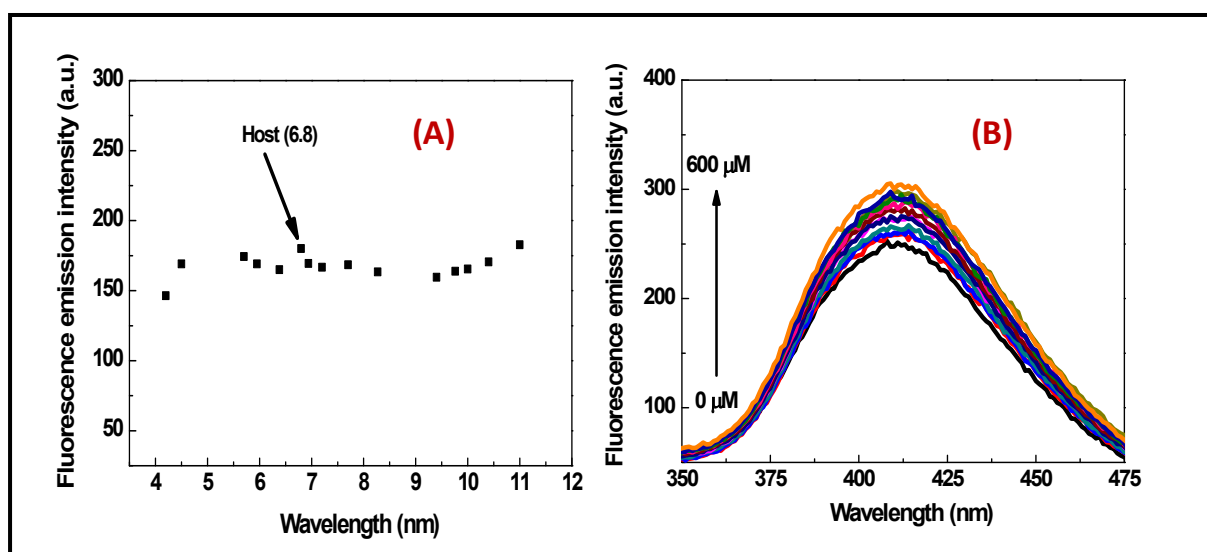

Figure 17S. (A) Effect of pH on fluorescence emission profile of 1-ONP; (B) Effect of a heavy salt i.e. tetrabutylammoniumperchlorate on 1-ONP

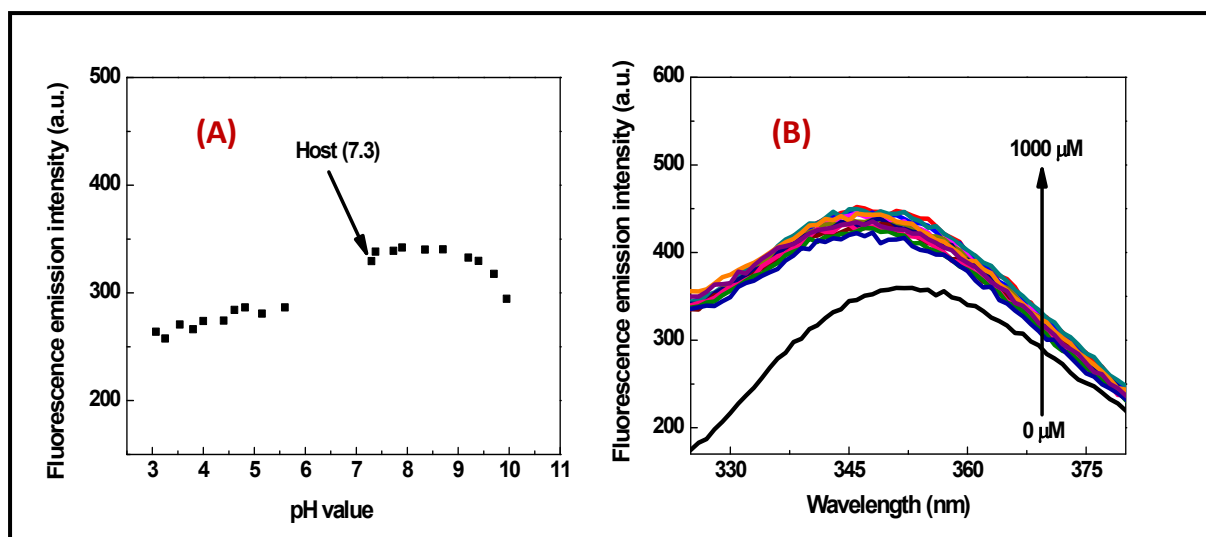

Figure 18S. (A) Effect of pH on 2-ONP fluorescence emission profile; (B) Effect of a heavy salt i.e. tetrabutylammoniumperchlorate on 2-ONP

Table:

| S. N. | Journal name                                 | Receptor                                                                                                                             | Analyte | Limit of detection   |
|-------|----------------------------------------------|--------------------------------------------------------------------------------------------------------------------------------------|---------|----------------------|
| 1.    | Shamsipur <i>et al.</i> <sup>29</sup>        | PVC membrane electrode based on 1,5-diaza-2,3,4-naphthyl-8,11,14 trioxacyclohexadecane- 6,16-dione (16-membered macrocyclic diamide) | Cs(I)   | 4.7 $\mu\text{M}$    |
| 2.    | Talanova <i>et al.</i> <sup>30</sup>         | Calix[4]arenebis(crown-6 ether) containing one pendent dansyl group                                                                  | Cs(I)   | $4 \times 10^{-7}$ M |
| 3.    | Levine <i>et al.</i> <sup>31</sup>           | 2,4-bis[4-(N,N-dihydroxyethylamino)-phenyl] squaraine                                                                                | Cs(I)   | 0.096 $\mu\text{M}$  |
| 4.    | Leray and Valeur <i>et al.</i> <sup>32</sup> | Calix[4]arene-bis(crown-6-ether) based receptor                                                                                      | Cs(I)   | 3.7 mM               |
| 5.    | Arvand <i>et al.</i> <sup>35</sup>           | Zeolite KY modified sol-gel matrix as an electrochemical sensor for potentiometric determination of cesium ions in water samples     | Cs(I)   | 7.3 $\mu\text{M}$    |
| 6.    | Jiang <i>et al.</i> <sup>36</sup>            | Schiff base directed 8-hydroxyquinoline-5-carbaldehyde in                                                                            | Al(III) | $10^{-7}$ M          |

|            |                                        |                                                                                                                                                                           |         |                        |
|------------|----------------------------------------|---------------------------------------------------------------------------------------------------------------------------------------------------------------------------|---------|------------------------|
|            |                                        | weak acid aqueous medium.                                                                                                                                                 |         |                        |
| <b>7.</b>  | Bera <i>et al.</i> <sup>37</sup>       | A neutral imidazol carrier i.e. 2-(4,5-dihydro-1,3-imidazol-2-yl)phenol based liquid membrane electrode in a poly(vinyl chloride) (PVC) matrix for potentiometric sensing | Al(III) | $7 \times 10^{-7}$ M   |
| <b>8.</b>  | Maity and Govindaraju <sup>38</sup>    | Conformationally constrained (coumarin-pyrrolidinyl-triazolyl-bipyridyl) fluoroionophore conjugate in CH <sub>3</sub> CN                                                  | Al(III) | $1.0 \times 10^{-7}$ M |
| <b>9.</b>  | Mashhadizadeh and Talemi <sup>39</sup> | Carbon paste electrode modified with silica sol-gel and mercaptosuccinic acid (MSA) in presence of gold nano-particles                                                    | Al(III) | $1.6 \times 10^{-7}$ M |
| <b>10.</b> | Gholivand <i>et al.</i> <sup>40</sup>  | PVC membrane and a Schiff base i.e. N,N'-bis(salicylidene)-1,2-phenylenediamine (salophen) oriented electrochemical sensor                                                | Al(III) | $6.0 \times 10^{-7}$ M |

Table 1: The comparative account of various chemosensors towards chemosensing of Cs(I) and Al(III)
